# Supplementary material for: Drug mechanism‐of‐action discovery through the integration of pharmacological and CRISPR screens
Source: PubMed Central journal article supplement (PMC7336273; doi:10.15252/msb.20199405), 2020-07-06
Supplement: MSB-16-e9405-s001.pdf [file MSB-16-e9405-s001.pdf]

## Expanded View Figures

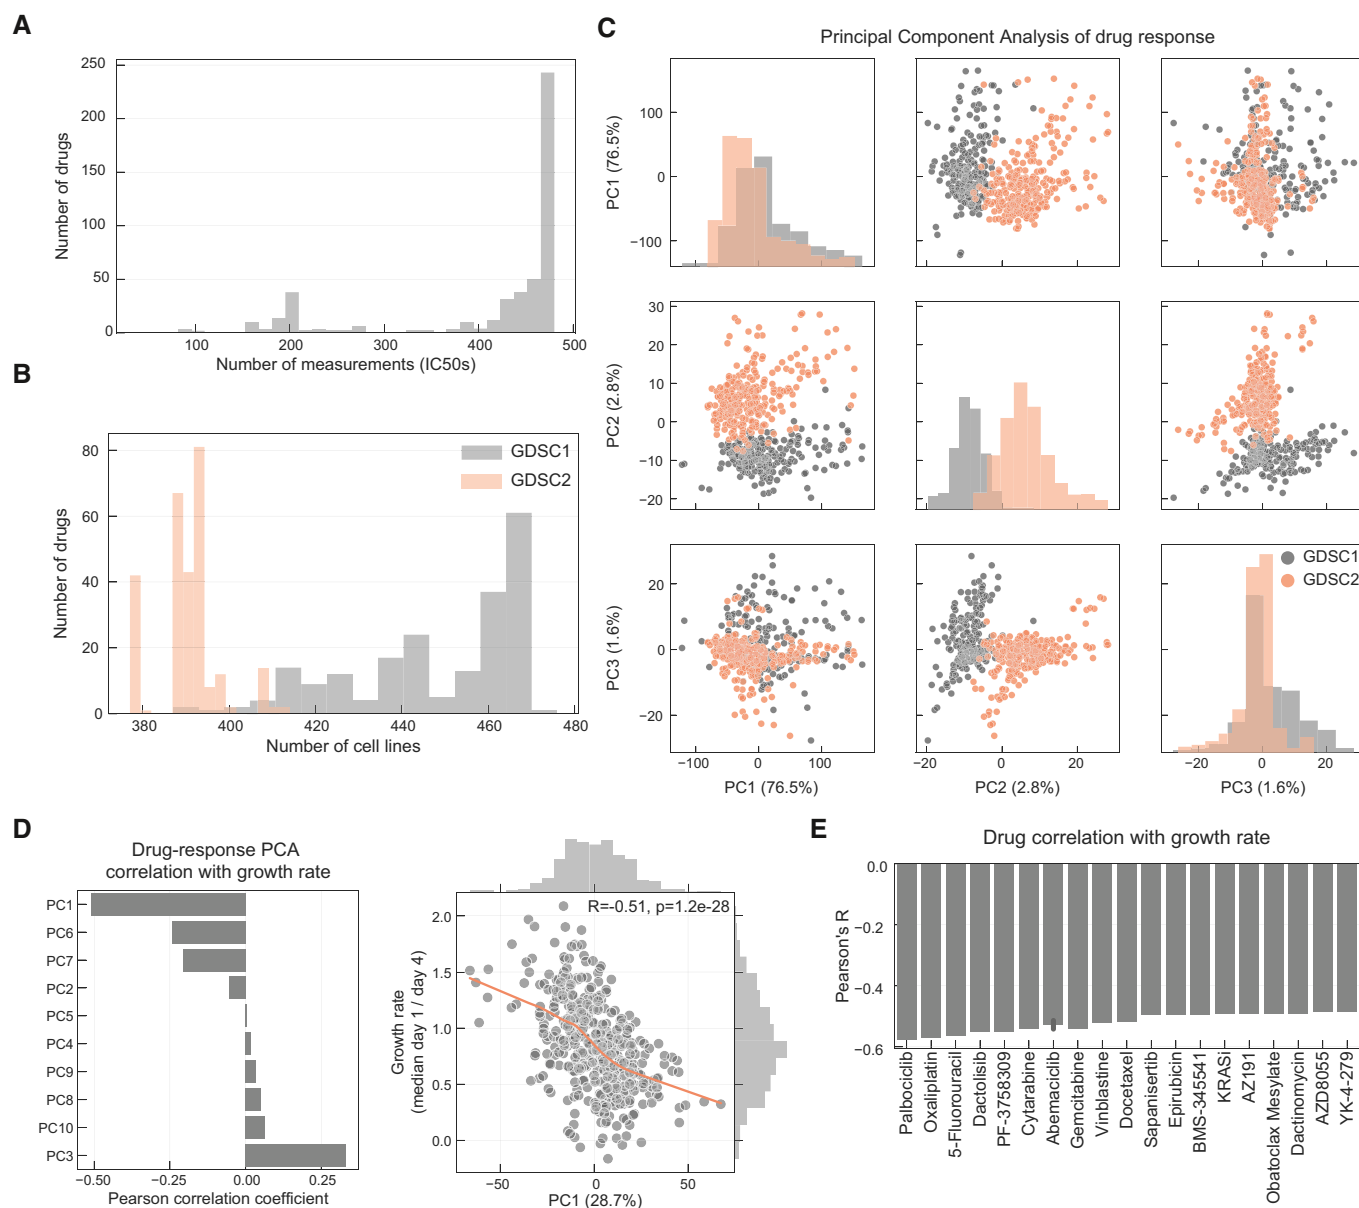

**Figure EV1. Overview of the drug sensitivity data sets.**

- A Histogram of the number of  $IC_{50}$  values measured per drug.
- B Number of drugs measured per cell line in each pharmacological data set.
- C PCA analysis of the drug response measurements separated by GDSC1 and GDSC2.
- D Pearson correlation coefficient between each principal component (PC) and cell lines growth rate.
- E Top absolutely correlated drugs with growth rate.

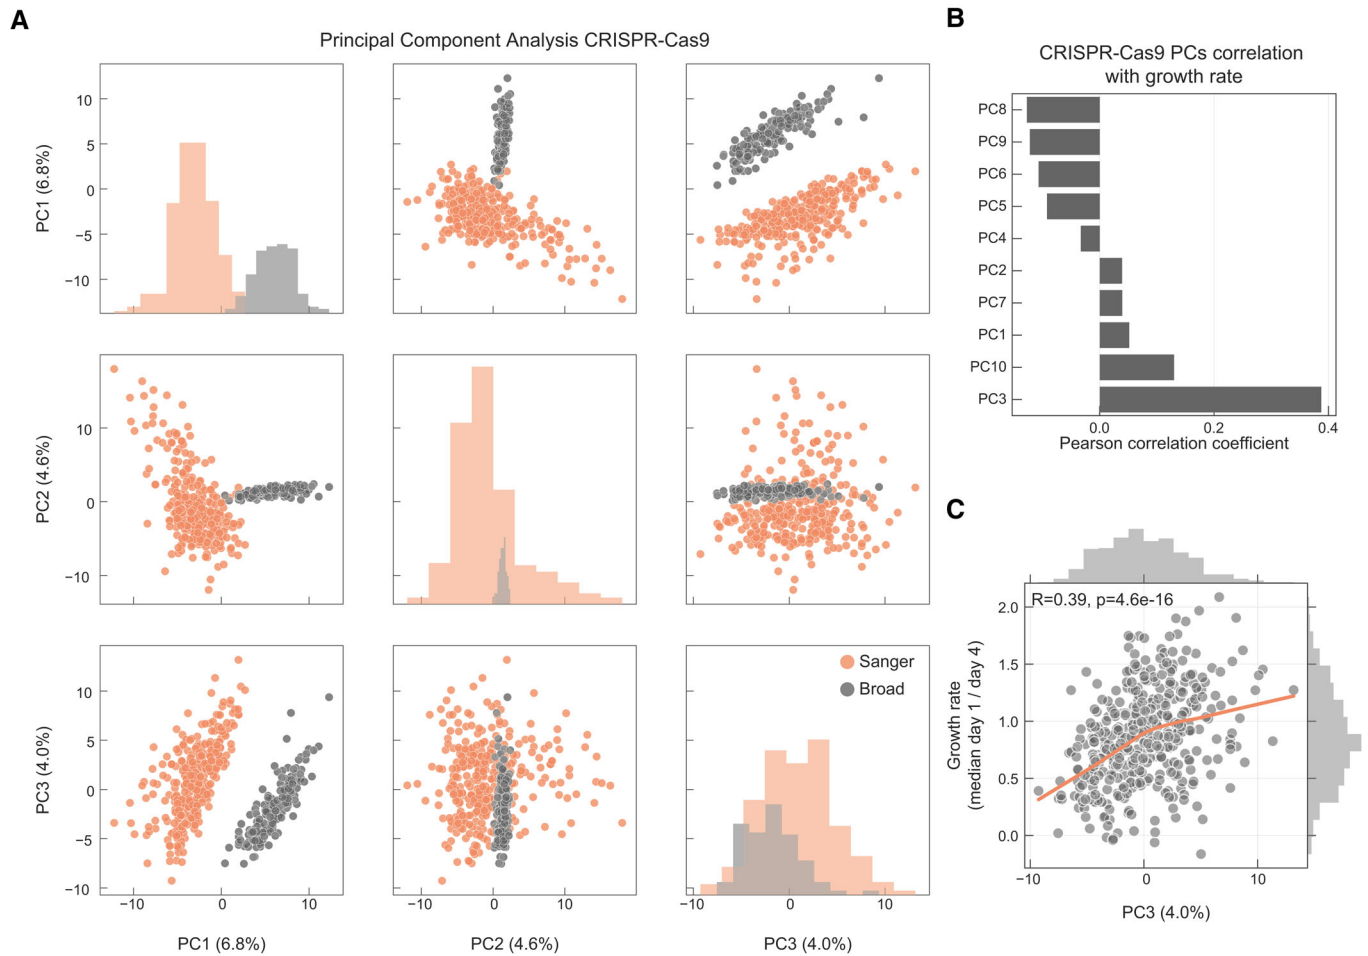

**Figure EV2. Overview of the CRISPR-Cas9 data sets.**

- A PCA analysis of the samples in the CRISPR-Cas9 screens, samples institute of origin is highlighted.  
 B Correlation coefficients between all top 10 PCs and growth rate.  
 C Correlation between cell lines growth rate and PC3 (Pearson correlation coefficient reported in the top left).

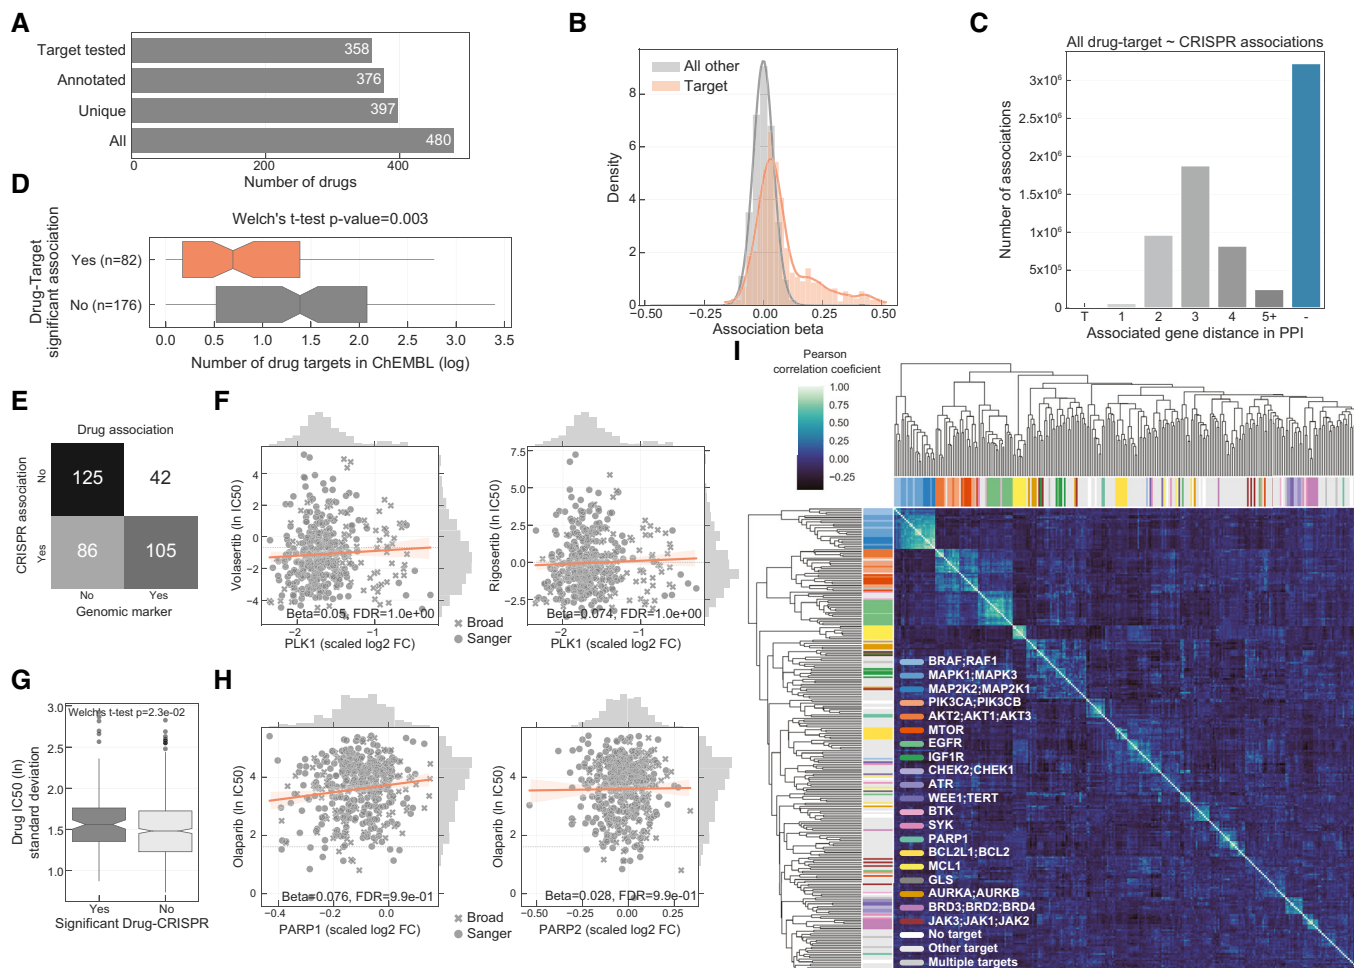

**Figure EV3. Drug response and gene fitness associations.**

- A Total number of drugs utilised in the study and the different levels of information available: "All" represents all the drugs including replicates screened with different technologies (GDSC1 and GDSC2); "Unique" counts the number of unique drug names; "Annotated" shows the number of unique drugs with manual annotation of nominal targets; and "Target tested" represents the number of unique drugs, with target information, for which the target has been knocked-out in the CRISPR-Cas9 screens.
- B Histogram of the drug–gene associations effect sizes (beta) highlighting drug–target associations.
- C Distribution of the shortest path lengths between all the tested drug–gene pairs. For drugs with multiple targets the smallest shortest path of all the targets was taken. T represents the drug target and "–" represents no link was found.
- D Distribution of number of drug targets found in an unsupervised way using the ChEMBL database. Drugs are grouped by having significant drug–target associations. Box-and-whisker plots show 1.5× interquartile ranges and 5–95<sup>th</sup> percentiles, centres indicate medians.
- E Contingency matrix of significant drug associations with CRISPR fold changes and binarised event matrix of genomic features, i.e. mutations and copy number gain or loss.
- F PLK1 inhibitors drug response correlation with PLK1 knockout log<sub>2</sub> fold change (FC) gene fitness effects. The dashed grey line indicates the dose response highest drug concentration.
- G Drug–target associations split by significance (FDR-adjusted likelihood-ratio test  $P$ -value < 10%) plotted against the standard deviation of the drug IC<sub>50</sub> (ln) measurements of the respective pair (significant "Yes"  $n$  = 129, significant "No"  $n$  = 684). Box-and-whisker plots show 1.5× interquartile ranges and 5–95<sup>th</sup> percentiles, centres indicate medians.
- H Similar to (F), correlation of olaparib drug response and both targets PARP1 and PARP2 gene fitness effects.
- I Correlation heatmap of the drug–gene effect size across all the genes. Drugs are coloured according to their targets.

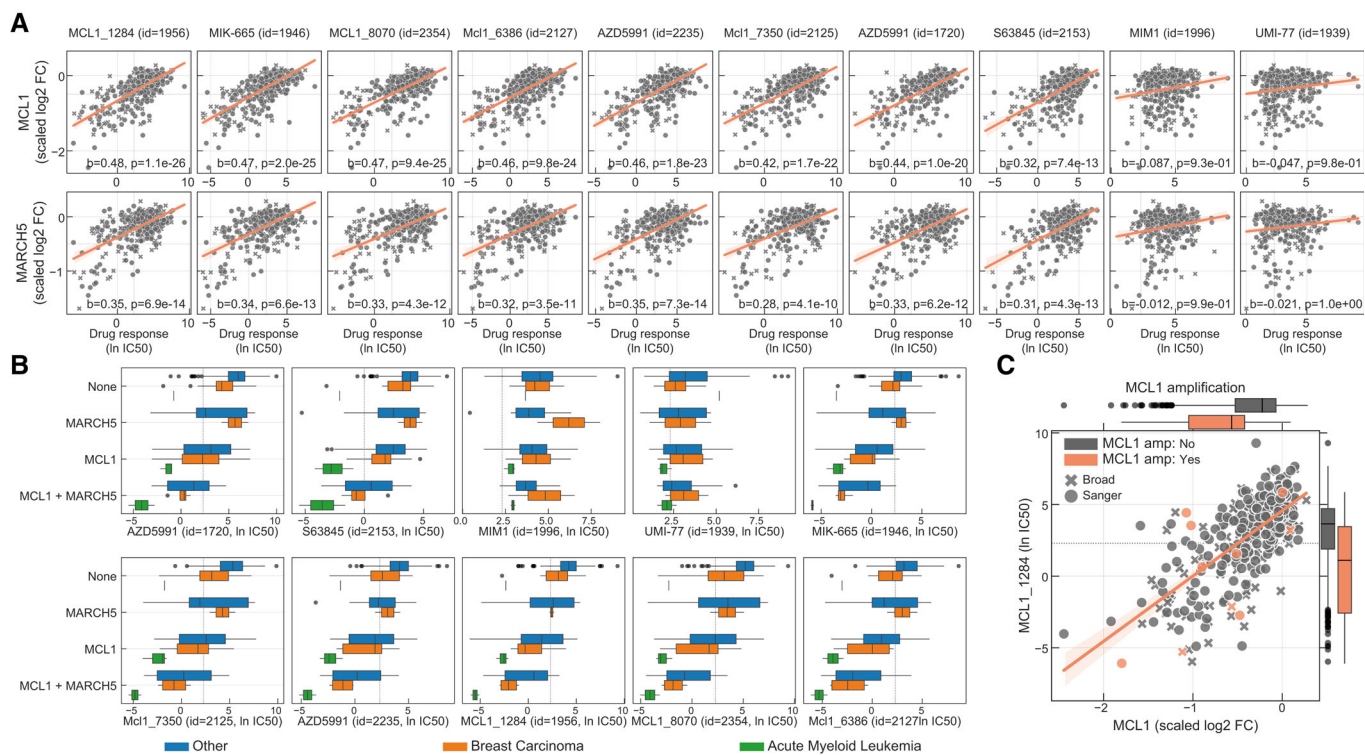

**Figure EV4. MCL1 inhibitors.**

- A Correlation of all MCL1 inhibitor IC<sub>50</sub> values against MCL1 and MARCH5 gene fitness profiles. Effect sizes (*b*) and FDR (*P*) of the association are reported on the bottom.
- B Stratification of the MCL1 inhibitors drug response measurements according to the cell line dependency on MARCH5 and/or MCL1. Gene vulnerabilities are independent from each other, meaning knockouts were introduced independently and not at the same time. Responses are then split according to the cancer type of the cell lines. Number of measurements per boxplot are: acute myeloid leukaemia (MCL1 = 3, MCL1 + MARCH5 = 2, None = 1), breast carcinoma (MARCH5 = 2, MCL1 = 9, MCL1 + MARCH5 = 4, None = 14) and Other (MARCH5 = 9, MCL1 = 52, MCL1 + MARCH5 = 21, None = 236). Vulnerable cell lines to MARCH5 and MCL1 knockout were defined as those with a depletion of at least 50% of that visible for essential genes on the particular cell line (scaled log<sub>2</sub> fold change < -0.5). Grey dashed line represents the maximum concentration used in the dosage response curve of the respective drug. Box-and-whisker plots show 1.5<sup>th</sup> interquartile ranges and 5–95<sup>th</sup> percentiles, centres indicate medians.
- C Representative example of a MCL1 inhibitor and their relation with MCL1 gene fitness, with cell lines containing copy number amplification of MCL1 highlighted in orange. Copy number amplified cells were defined taking into consideration their ploidy status, cells with (ploidy ≤ 2.7 and copy number ≥ 5) or (ploidy > 2.7 and copy number ≥ 9) were considered as having MCL1 amplified. Box-and-whisker plots show 1.5<sup>th</sup> interquartile ranges and 5–95<sup>th</sup> percentiles, centres indicate medians.

**Figure EV5. Robust pharmacological associations.**

- A Most frequent genomic alterations across the cancer cell lines.
- B, C Most significant associations between (B), genomic features and (C), gene expression profiles with drug response and gene fitness.
- D Number of significant drug–gene pairs across the different types of interactions. Drug–gene pairs were categorised considering the shortest path length between the drug target(s) and the associated gene. T represents the drug target and “–” represents no link was found.
- E Robust pharmacological association between the expression of BCL2L1 and the significantly correlated pair of MCL1\_1284 drug and MCL1 gene fitness profile.
- F Similarly to (E), but instead it represents a robust pharmacological association between BAX and MDM2 and Nutlin-3a.



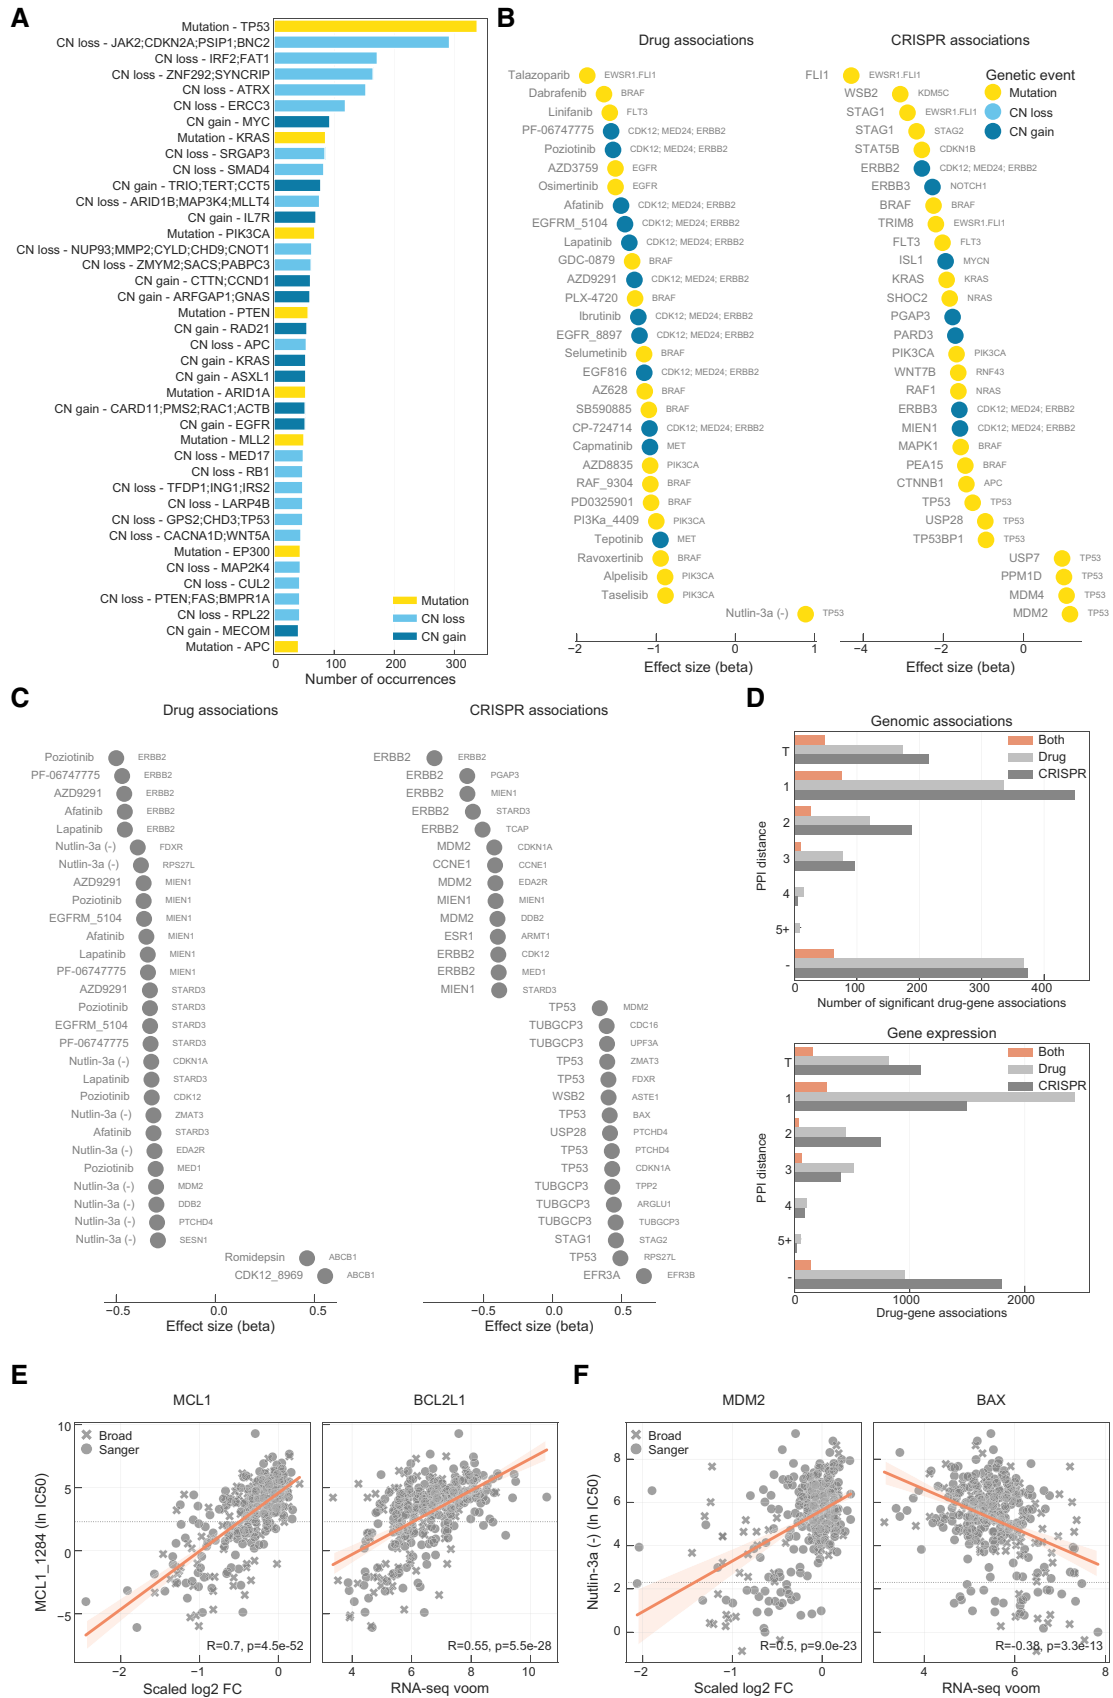

Figure EV5.
